# Supplementary material for: Metabolic consequences of various fruit-based diets in a generalist insect species
Source: eLife. 2023 Jun 6;12:e84370. doi: 10.7554/eLife.84370 (PMC10259468; doi:10.7554/eLife.84370)
Supplement: Supplementary file 1. [file elife-84370-supp1.xlsx]

## Sheet: Legend
Supplementary File 1: Table of all identified metabolites, their physicial properties, presence in fruits and flies (this study), and previous identifications in fruits

## Sheet: Supplementary Table 1
name	family	formula	RT	[M+H]+ or [M-H]- ion mass (u)	Ionisation mode	standard validation	MS2	validation online database	Identification confidence level	flies	fruits	blackcurrant	cherry	cranberry	strawberry
Asparagine	AA	C4H8N2O3	1.15	133.061	pos	yes	74.02365_C2H4O2N ; 43.01784_C2H3O ; 102.05108_C4H8O2N	mzCloud	1		cherry, strawberry
Glutamine	AA	C5H10N2O3	1.15	147.076	pos	yes	84.04437_C4H6ON ; 56.04945_C3H6N	mzCloud	1		blackcurrant, strawberry
Oxoproline	AA	C5H8N2O3	1.15	130.05	pos	yes	84.04437_C4H6ON ; 56.04945_C3H6N ; 44.01309_CH2ON	mzCloud	1		strawberry
Proline	AA	C5H9NO2	1.18	116.071	pos	yes	70.06514_C4H8N	mzCloud	1		cherry
Pelargonidin rutinoside	AN	C27H31O14	1.68	579.171	pos	no	433.11263_C21H21O10 ; 271.06_C15H11O5	Pubchem	2		strawberry	[1–3], but see [4]	[5–10]		[11–17]
Cyanidin glucoside	AN	C21H21O11	1.63	449.108	pos	yes	287.05496_C15H11O6	mzCloud	1	blackcurrant	blackcurrant, cherry, cranberry	[4,17–24]	[5–8,10,25–28]	[29–32]	[14–17,33]
Cyanidin arabinoside	AN	C20H19O10	1.68	419.097	pos	no	287.05493_C15H11O6	MassBank	2	cranberry	cranberry	[2]		[29–32]
Cyanidin rutinoside	AN	C27H31O15	1.62	595.166	pos	no	449.1080_C21H21O11 ; 287.05497_C15H11O6	mzCloud	2		blackcurrant, cherry	[4,17–24,34]	[5–8,10,25–28]		[15,16]
Cyanidin coumaroyl glucoside	AN	C30H27O13	3.61	595.144	pos	no	287.05497_C15H11O6	No	2			[2]
Peonidin galactoside	AN	C22H23O11	1.69	463.123	pos	no	301.07062_C16 H13 O6	MassBank	2	cranberry	cranberry			[29,30,32,35]
Peonidin rutinoside	AN	C28H33O15	1.68	609.181	pos	no	463.1237_C22H23O11 ; 301.07054_C16H13O6	No	2	cherry	cherry	[2,22]	[5–8,10,25–28]
Delphinidin glucoside	AN	C21H21O12	1.26	465.103	pos	yes	303.04984_C15H11O7	mzCloud	1	blackcurrant	blackcurrant	[1,4,17,18,20–24,34]
Delphinidin rutinoside	AN	C27H31O16	1.32	611.16	pos	no	465.1027_C21H21O12 ; 303.04984_C15H11O7	mzCloud	2		blackcurrant	[1,4,17–24,34]
Naringenin chalcone hexoside	F	C21H20O10	5.62	433.113	pos	no	271.06008_C15H11O5	No	3						[36]
Kaempferol glucoside	F	C21H20O11	5.05	449.108	pos	yes	287.05491_C15H11O6	mzCloud	1	blackcurrant		[1,20,22,37,38]	[8,26]		[16,33,39]
Kaempferol glucuronide	F	C21H18O12	5.32	463.087	pos	yes	287.05491_C15H11O6	MassBank	1						[33]
Kaempferol rutinoside	F	C27H30O15	4.48	595.166	pos	yes	449.1081_C21H21O11 ; 287.0551_C15H11O6	mzCloud	1			[22,38]	[26,27,40]
Kaempferol malonylglucoside	F	C24H22O14	5.95	535.108	pos	no	287.05487_C15H11O6	MassBank	2						[16,39]
Dihydrokaempferol glucoside	F	C21H22O11	2.67	451.123	pos	no	289.07067_C15H16O6	No	2						[16,33,39]
Quercetin	F	C15H10O7	7.16	303.05	pos	yes	153.01828_C7 H5 O4 ; 229.04960_C13 H9 O4 ; 137.02332_C7 H5 O3	mzcloud	1			[4,41,42]		[43–47]	[33]
Quercetin rhamnoside	F	C21H20O11	6.28	447.093	neg	yes	301.03487_C15H9O7	mzCloud	1		cranberry		[8]	[47]
Quercetin arabinoside	F	C20 H18 O11	4.92	435.092	pos	no	303.04995_C15 H11 O7	MassBank	2	cranberry	cranberry			[45,46]
Quercetin glucoside	F	C21H20O12	4.14	465.103	pos	yes	303.05002_C15H11O7	mzCloud	1		blackcurrant, cherry	[20,22,23,38]	[8,26,40]	[47]	[16,36,39]
Quercetin glucuronide	F	C21H18O13	4.52	479.082	pos	yes	303.04994_C15 H11 O7	MassBank	1			[38]			[16,39]
Quercetin rutinoside	F	C27H30O16	3.6	611.161	pos	yes	465.10274_C21H21O12 ; 303.04987_C15H11O7	mzCloud	1		blackcurrant, cherry	[20,22,23,37]	[8,25–28,40]		[16,39]
Quercetin galactoside	F	C21H20O12	5.22	463.088	neg	no	301.03503_C15 H9 O7	MassBank	2	cherry	cranberry	[38]	[8]	[45–47]
Myricetin glucoside	F	C27H30O17	3.15	481.098	pos	no	319.04472_C15H11O8	MassBank	2		blackcurrant	[22,23]
Myricetin rutinoside	F	C27H30O17	2.8	627.155	pos	no	481.0978_C21H21O13 ; 319.04472_C15H11O8	No	3	blackcurrant	blackcurrant	[22,23,37]
Syringetin arabinoside	F	C22H22O12	6.37	479.118	pos	no	347.077240_C17H15O8	No	3
Syringetin glucoside	F	C23 H24 O13	4.98	507.114	neg	yes	344.05306_C17H12O8 ; 345.06103_C15H13O8	MassBank	1	cranberry
Coumaroylquinicacid1	CAD	C16H18O8	2.33	337.093	neg	no	163.03987_C9H7O3 ; 119.05015_C8H7O	Pubchem	2	cherry	cherry	[22]	[5–8,10,25,27]
Coumaroylquinic acid2	CAD	C16H18O8	3.32	337.093	neg	no	173.04547_C7H9O5; 163.03982_C9H7O3 ; 119.05019_C8H7O	Pubchem	2			[22]	[5–8,10,25,27]
Coumaroylquinic acid3	CAD	C16H18O8	3.03	337.093	neg	no	163.03982_C9H7O3 ; 119.05006_C8H7O	Pubchem	2			[22]	[5–8,10,25,27]
Coumaroylquinic acid4	CAD	C16H18O8	3.68	337.093	neg	no	119.05006_C8H7O	Pubchem	2			[22]	[5–8,10,25,27]
Neochlorogenic acid	CAD	C16H18O9	1.88	353.088	neg	yes	191.05587_C7H11O6 ; 179.03477_C9H7O4 ; 173.04541_C7H9O5 ; 135.04497_C8H7O2	mzCloud	1	cherry	cherry	[20,22]	[5–8,10,25]
Chlorogenic acid	CAD	C16H18O9	2.8	355.108	pos	yes	163.0389_C9 H7 O3 ; 135.04400_C8 H7 O2	mzCloud	1		cranberry	[20,22]	[5–8,10,25]	[48,49]
Cinnamoyl glucoside	CAD	C16H20O9	5.2	355.103	pos	no	309.09764_C15H17O7 ; 147.04510_C8H7O2	No	3		strawberry
Coumaroyl Hexoside1	CAD	C15H18O8	2.18	325.093	neg	no	145.02941_C9H5O2 ; 117.03453_C8H5O	Pubchem	2			[50]		[50,51]	[50]
Coumaroyl Hexoside2	CAD	C15H18O8	2.3	325.092	neg	no	145.02941_C9H5O2 ; 117.03453_C8H5O	Pubchem	2	strawberry		[50]		[50]	[50]
Coumaroyl Hexoside3	CAD	C15H18O8	2.5	325.092	neg	no	145.02941_C9H5O2 ; 117.03453_C8H5O	Pubchem	2		strawberry	[50]		[50]	[50]
Methyl syringin	CAD	C18H26O9	7.13	385.15	neg	no	223.09727_C12H15O4	No	3	strawberry					[52]
Amygdalin	M	C20H27O11N	2.27	475.192	pos	no	296.11289_C14H18O6N ;158.06003_C10H8ON	mzCloud	2		cherry		[67]
Indole derivated	M	C13H14N2O2	2.38	231.113	pos	no	158.09641_C11H12N ; 118.06506_C9H8N	No	3	blackcurrant
3-carboxymethyl-Indole-N-glucoside	M	C16H19O7N	2.92	336.109	neg	no	130.06606_C9H8N ; 292.1189_C15H18O5N ; 142.06604_C10H8N	mzCloud	2	blackcurrant		[53]
Ethyl cinnamate	CAD	C11H12O2	7.64	177.091	pos	yes	133.06472_C9H9O ; 115.05414_C9H7	No	1	strawberry					[54]
Acylphloroglucinol glucoside	M	C16H22O9	5.3	359.134	pos	no	197.0808_C10H13O4 ; 139.03892_C7H7O3 ; 123.04397_C7H7O2	No	2	strawberry					[55]
Benzylalcohol diglucoside	BAD	C19H28O11	1.95	431.156	neg	no	269.10278_C13H17O6	MassBank	2	cherry			[56]
Glucuronic Acid	OA	C6H10O7	1.28	193.035	neg	yes	165.04018_C5H9O6	mzCloud	1		blackcurrant
Gluconic acid	OA	C6H12O7	1.3	195.05	neg	yes	147.02994_C5H7O5 ; 161.04559_C6H9O5	mzCloud	1		cherry, strawberry
Apionic acid	OA	C5H10O6	1.27	165.04	neg	no	75.00875_C2H3O3 ; 59.01381_C2H3O2	No	3		blackcurrant
Ascorbic acid	OA	C6H8O6	1.32	175.024	neg	yes	115.00362_C4H3O4	mzCloud	1		blackcurrant	[19,38,42]	[57]	[29,30]	[14,58]
Citric acid	OA	C6H8O7	1.74	191.019	neg	yes	111.00876_C5H3O3 ; 87.00867_C3H3O3	mzCloud. PubChem	1	blackcurrant	blackcurrant, strawberry	[19,38]	[10,57]	[29,30,49,59]	[14,58]
Malic acid	OA	C4H6O5	1.47	133.013	neg	yes	71.01382_C3H3O2	mzCloud	1		cherry, strawberry	[19,38]	[7,10,26,57]	[29,30,49,59]	[14,58,60]
Quinic acid	OA	C7H12O6	1.33	191.055	neg	yes	93.03453_C6 H5 O	mzCloud. MassBank	1	cranberry	cherry, cranberry, strawberry	[19,38]	[26]	[29,30,49]	[61]
Quinic acid diglycoside	OA	C19H34O17	1.27	533.172	neg	no	191.05572_C7H11O6	No	2	cranberry	cranberry	[19,38]
Benzoic acid hexoside	BAD	C13H16O7	3.11	329.088	neg	no	121.02936_C7 H5 O2	No	3	cranberry				[29,32,48]
Hippuric acid	BAD	C9H9NO3	3.37	180.065	pos	no	105.03394_C7H5O ; 120.08072_C8 H10 N	mzCloud. MassBank	2	cranberry				[62]
Catechin	PC	C15H14O6	2.37	291.086	pos	yes	139.03896_C7 H7 O3 ;147.04407_C9 H7 O2	mzCloud	1			[42]	[5,8,10]	[31,46,48]	[36]
Epicatechin	PC	C15H14O6	2.77	291.086	pos	yes	139.03896_C7 H7 O3 ;147.04407_C9 H7 O2	mzCloud	1		cherry	[1,42]	[5,10,25]	[31,34,44]
Procyanidin A2	PC	C30H24O12	4.55	577.135	pos	yes	287.05507_C15 H11 O6	inhouse	1		cranberry			[63]
Disaccharide	S	C12H22O11	1.18	341.109	neg	no	179.05595_C6H11O6	mzCloud	1		blackcurrant, strawberry
hexopolyol	S	C6H12O6	1.22	181.071	pos	no	71.01385_C3H3O2 ; 59.01371_C2H3O2	mzCloud	2		cherry
Mannitol-hexose	S	C12H24O11	1.2	343.125	pos	no	181.07139_C6H13O6 ; 163.06105_C6H11O5	MassBank	2	cherry	cherry
Carboxylinalool glucoside	T	C16H26O8	3.43	364.197	pos	no	185.11719_C10H17O3 ; 167.10663_C10H15O2 ; 121.10111_C9H13	No	3	blackcurrant
Linalooloxide glucoside	T	C16H28O7	3.57	350.217	pos	yes	171.13794_C10H19O2 ; 153.12739_C10H17O ; 135.11682_C10H15	No	1	blackcurrant		[64]
Diterpene-hexoside	T	C26H28O9	5.43	485.181	pos	no	323.12768_C20H19O4 ; 291.10145_C19H15O3	No	3	blackcurrant		[66]
Diterpene2 hexoside	T	C26H30O9	7.1	487.196	pos	no	325.14349_C20H21O4 ; 267.10160_C17H15O3	No	3	blackcurrant		[66]
Nerolidol hexoside	T	C21H34O6	6.7	383.243	pos	no	203.17939_C15H23 ; 145.10122_C11H13	No	2	strawberry					[63]
nerolidol	T	C15H24O	7.37	203.179	pos	yes	145.10122_C11H13 ; 119.08551_C9H11 ; 105.06982_C8H9	NIST	2	strawberry					[63]
Linalyl arabinosylglucoside	T	C21H34O10	6.76	493.229	pos	no	449.23862_C21H37O10 ; 317.19606_C16H29O6 ; 137.1325_C10H17	No	2	strawberry					[63]
Benzoic acid pentosyl hexoside	BAD	C18H24O11	2.37	434.166	pos	no	123.04397_C7 H7 O2 ;285.09695_C13 H17 O7 ; 295.10242_C11 H19 O9	No	3					[48]

## Sheet: Litterature Cited
References
1.	Allwood JW, Woznicki TL, Xu Y, Foito A, Aaby K, Sungurtas J, et al. Application of HPLC-PDA-MS metabolite profiling to investigate the effect of growth temperature and day length on blackcurrant fruit. Metabolomics. 2019;15: 12. doi:10.1007/s11306-018-1462-5
2.	Slimestad R, Solheim H. Anthocyanins from black currants (Ribes nigrum L.). J Agric Food Chem. 2002;50: 3228–3231. doi:10.1021/jf011581u
3.	Gopalan A, Reuben SC, Ahmed S, Darvesh AS, Hohmann J, Bishayee A. The health benefits of blackcurrants. Food Funct. 2012;3: 795. doi:10.1039/c2fo30058c
4.	Mattila PH, Hellström J, Karhu S, Pihlava J-M, Veteläinen M. High variability in flavonoid contents and composition between different North-European currant (Ribes spp.) varieties. Food Chem. 2016;204: 14–20. doi:10.1016/j.foodchem.2016.02.056
5.	Gonçalves B, Landbo A-K, Let M, Silva AP, Rosa E, Meyer AS. Storage affects the phenolic profiles and antioxidant activities of cherries (Prunus avium L) on human low-density lipoproteins. J Sci Food Agric. 2004;84: 1013–1020. doi:10.1002/jsfa.1752
6.	Usenik V, Fabčič J, Štampar F. Sugars, organic acids, phenolic composition and antioxidant activity of sweet cherry (Prunus avium L.). Food Chem. 2008;107: 185–192. doi:10.1016/j.foodchem.2007.08.004
7.	Ballistreri G, Continella A, Gentile A, Amenta M, Fabroni S, Rapisarda P. Fruit quality and bioactive compounds relevant to human health of sweet cherry (Prunus avium L.) cultivars grown in Italy. Food Chem. 2013;140: 630–638. doi:10.1016/j.foodchem.2012.11.024
8.	Cao J, Jiang Q, Lin J, Li X, Sun C, Chen K. Physicochemical characterisation of four cherry species (Prunus spp.) grown in China. Food Chem. 2015;173: 855–863. doi:10.1016/j.foodchem.2014.10.094
9.	Martini S, Conte A, Tagliazucchi D. Phenolic compounds profile and antioxidant properties of six sweet cherry (Prunus avium) cultivars. Int Food Res J. 2017;97: 15–26. doi:10.1016/j.foodres.2017.03.030
10.	Kelebek H, Selli S. Evaluation of chemical constituents and antioxidant activity of sweet cherry (Prunus avium L.) cultivars: Chemical constituents of sweet cherry. Int J Food Sci Technol. 2011;46: 2530–2537. doi:10.1111/j.1365-2621.2011.02777.x
11.	Wang SY, Zheng W. Effect of plant growth temperature on antioxidant capacity in strawberry. J Agric Food Chem. 2001;49: 4977–4982. doi:10.1021/jf0106244
12.	Wang SY, Lin H-S. Compost as a soil supplement increases the level of antioxidant compounds and oxygen radical absorbance capacity in strawberries. J Agric Food Chem. 2003;51: 6844–6850. doi:10.1021/jf030196x
13.	Wang SY, Bunce JA, Maas JL. Elevated carbon dioxide increases contents of antioxidant compounds in field-grown strawberries. J Agric Food Chem. 2003;51: 4315–4320. doi:10.1021/jf021172d
14.	Crespo P, Bordonaba JG, Terry LA, Carlen C. Characterisation of major taste and health-related compounds of four strawberry genotypes grown at different Swiss production sites. Food Chem. 2010;122: 16–24. doi:10.1016/j.foodchem.2010.02.010
15.	da Silva FL, Escribano-Bailón MT, Pérez Alonso JJ, Rivas-Gonzalo JC, Santos-Buelga C. Anthocyanin pigments in strawberry. LWT-Food Sci Technol. 2007;40: 374–382. doi:10.1016/j.lwt.2005.09.018
16.	Giampieri F, Tulipani S, Alvarez-Suarez JM, Quiles JL, Mezzetti B, Battino M. The strawberry: Composition, nutritional quality, and impact on human health. Nutrition. 2012;28: 9–19. doi:10.1016/j.nut.2011.08.009
17.	Bordonaba JG, Crespo P, Terry LA. A new acetonitrile-free mobile phase for HPLC-DAD determination of individual anthocyanins in blackcurrant and strawberry fruits: A comparison and validation study. Food Chem. 2011;129: 1265–1273. doi:10.1016/j.foodchem.2010.09.114
18.	Anisimovienė N, Jankauskienė J, Jodinskienė M, Bendokas V, Stanys V, Šikšnianas T. Phenolics, antioxidative activity and characterization of anthocyanins in berries of blackcurrant interspecific hybrids. Acta Biochim Pol. 2013;60: 767–772. doi:10.18388/abp.2013_2055
19.	Laaksonen O, Mäkilä L, Tahvonen R, Kallio H, Yang B. Sensory quality and compositional characteristics of blackcurrant juices produced by different processes. Food Chem. 2013;138: 2421–2429. doi:10.1016/j.foodchem.2012.12.035
20.	Vagiri M, Ekholm A, Öberg E, Johansson E, Andersson SC, Rumpunen K. Phenols and ascorbic acid in black currants (Ribes nigrum L.): Variation due to genotype, location, and year. J Agric Food Chem. 2013;61: 9298–9306. doi:10.1021/jf402891s
21.	Chen L, Xin X, Yuan Q, Su D, Liu W. Phytochemical properties and antioxidant capacities of various colored berries: Phytochemical properties and antioxidant capacities of colored berries. J Sci Food Agric. 2014;94: 180–188. doi:10.1002/jsfa.6216
22.	Cyboran S, Bonarska-Kujawa D, Pruchnik H, Żyłka R, Oszmiański J, Kleszczyńska H. Phenolic content and biological activity of extracts of blackcurrant fruit and leaves. Food Res Int. 2014;65: 47–58. doi:10.1016/j.foodres.2014.05.037
23.	Farooque S, Rose PM, Benohoud M, Blackburn RS, Rayner CM. Enhancing the potential exploitation of food waste: extraction, purification, and characterization of renewable specialty chemicals from blackcurrants (Ribes nigrum L.). J Agric Food Chem. 2018;66: 12265–12273. doi:10.1021/acs.jafc.8b04373
24.	Zhang J, Sun L, Dong Y, Fang Z, Nisar T, Zhao T, et al. Chemical compositions and alpha-glucosidase inhibitory effects of anthocyanidins from blueberry, blackcurrant and blue honeysuckle fruits. Food Chem. 2019;299: UNSP 125102. doi:10.1016/j.foodchem.2019.125102
25.	González-Gómez D, Lozano M, Fernández-León MF, Bernalte MJ, Ayuso MC, Rodríguez AB. Sweet cherry phytochemicals: Identification and characterization by HPLC-DAD/ESI-MS in six sweet-cherry cultivars grown in Valle del Jerte (Spain). J Food Compos Anal. 2010;23: 533–539. doi:10.1016/j.jfca.2009.02.008
26.	Nawirska-Olszańska A, Kolniak-Ostek J, Oziembłowski M, Ticha A, Hyšpler R, Zadak Z, et al. Comparison of old cherry cultivars grown in Czech Republic by chemical composition and bioactive compounds. Food Chem. 2017;228: 136–142. doi:10.1016/j.foodchem.2017.01.154
27.	Noratto GD, Lage NN, Chew BP, Mertens-Talcott SU, Talcott ST, Pedrosa ML. Non-anthocyanin phenolics in cherry (Prunus avium L.) modulate IL-6, liver lipids and expression of PPARδ and LXRs in obese diabetic (db/db) mice. Food Chem. 2018;266: 405–414. doi:10.1016/j.foodchem.2018.06.020
28.	Acero N, Gradillas A, Beltran M, García A, Muñoz Mingarro D. Comparison of phenolic compounds profile and antioxidant properties of different sweet cherry (Prunus avium L.) varieties. Food Chem. 2019;279: 260–271. doi:10.1016/j.foodchem.2018.12.008
29.	Watson DJ. Chemical characterization of wild Maine cranberries. University of Maine. 2001.
30.	Bazinet L, Brianceau S, Dubé P, Desjardins Y. Evolution of cranberry juice physico-chemical parameters during phenolic antioxidant enrichment by electrodialysis with filtration membrane. Sep Purif Technol. 2012;87: 31–39. doi:10.1016/j.seppur.2011.11.017
31.	Blumberg JB, Camesano TA, Cassidy A, Kris-Etherton P, Howell A, Manach C, et al. Cranberries and their bioactive constituents in human health. Adv Nutr. 2013;4: 618–632. doi:10.3945/an.113.004473
32.	McKay DL, Chen C-YO, Zampariello CA, Blumberg JB. Flavonoids and phenolic acids from cranberry juice are bioavailable and bioactive in healthy older adults. Food Chem. 2015;168: 233–240. doi:10.1016/j.foodchem.2014.07.062
33.	Cordenunsi BR, Genovese MI, do Nascimento JRO, Hassimotto NMA, dos Santos RJ, Lajolo FM. Effects of temperature on the chemical composition and antioxidant activity of three strawberry cultivars. Food Chem. 2005;91: 113–121. doi:10.1016/j.foodchem.2004.05.054
34.	Anttonen MJ, Karjalainen RO. High-performance liquid chromatography analysis of black currant (Ribes nigrum L.) fruit phenolics grown either conventionally or organically. J Agric Food Chem. 2006;54: 7530–7538. doi:10.1021/jf0615350
35.	Seeram NP, Adams LS, Hardy ML, Heber D. Total cranberry extract versus its phytochemical constituents: antiproliferative and synergistic effects against human tumor cell lines. J Agric Food Chem. 2004;52: 2512–2517. doi:10.1021/jf0352778
36.	Ornelas-Paz J de J, Yahia EM, Ramírez-Bustamante N, Pérez-Martínez JD, Escalante-Minakata M del P, Ibarra-Junquera V, et al. Physical attributes and chemical composition of organic strawberry fruit (Fragaria x ananassa Duch, Cv. Albion) at six stages of ripening. Food Chem. 2013;138: 372–381. doi:10.1016/j.foodchem.2012.11.006
37.	Mbeunkui F, Grace MH, Yousef GG, Ann Lila M. Isolation and characterization of flavonols from blackcurrant by high-performance counter-current chromatography and electrospray ionization tandem mass spectrometry: Other techniques. J Sep Sci. 2012;35: 1682–1689. doi:10.1002/jssc.201200198
38.	Suomela J-P, Vaarno J, Sandell M, Lehtonen H-M, Tahvonen R, Viikari J, et al. Children’s hedonic response to berry products: Effect of chemical composition of berries and hTAS2R38 genotype on liking. Food Chem. 2012;135: 1210–1219. doi:10.1016/j.foodchem.2012.05.079
39.	Aaby K, Ekeberg D, Skrede G. Characterization of phenolic compounds in strawberry (Fragaria × ananassa) fruits by different HPLC detectors and contribution of individual compounds to total antioxidant capacity. J Agric Food Chem. 2007;55: 4395–4406. doi:10.1021/jf0702592
40.	Ferretti G, Bacchetti T, Belleggia A, Neri D. Cherry antioxidants: From farm to table. Molecules. 2010;15: 6993–7005. doi:10.3390/molecules15106993
41.	Mikkonen TP, Määttä KR, Hukkanen AT, Kokko HI, Törrönen AR, Kärenlampi SO, et al. Flavonol content varies among black currant cultivars. J Agric Food Chem. 2001;49: 3274–3277. doi:10.1021/jf0010228
42.	Tabart J, Kevers C, Evers D, Dommes J. Ascorbic acid, phenolic acid, flavonoid, and carotenoid profiles of selected extracts from Ribes nigrum. J Agric Food Chem. 2011;59: 4763–4770. doi:10.1021/jf104445c
43.	Gramza-Michalowska A, Bueschke M, Kulczynski B, Gliszczynska-Swiglo A, Kmiecik D, Bilska A, et al. Phenolic compounds and multivariate analysis of antiradical properties of red fruits. J Food Meas Charact. 2019;13: 1739–1747. doi:10.1007/s11694-019-00091-x
44.	Côté J, Caillet S, Doyon G, Sylvain J-F, Lacroix M. Analyzing cranberry bioactive compounds. Crit Rev Food Sci Nutr. 2010;50: 872–888. doi:10.1080/10408390903042069
45.	Neto CC. Cranberry and its phytochemicals: A review of in vitro anticancer studies. J Nutr. 2007;137: 186S-193S. doi:10.1093/jn/137.1.186S
46.	Chen H, Zuo Y. Identification of flavonol glycosides in American cranberry fruit. Food Chem. 2007;101: 1357–1364. doi:10.1016/j.foodchem.2006.03.041
47.	Singh AP, Wilson T, Kalk AJ, Cheong J, Vorsa N. Isolation of specific cranberry flavonoids for biological activity assessment. Food Chem. 2009;116: 963–968. doi:10.1016/j.foodchem.2009.03.062
48.	Chen H, Zuo Y, Deng Y. Separation and determination of flavonoids and other phenolic compounds in cranberry juice by high-performance liquid chromatography. J Chromatogr A. 2001;913: 387–395. doi:10.1016/S0021-9673(00)01030-X
49.	Alekseenko EV. Research of biochemical composition and antioxidant activity of freeze-dried cranberry powder obtained on the basis of enzymatically processed berry pulp. Asian J Pharm. 2018;12. doi:10.22377/ajp.v12i02.2377
50.	Patras MA, Jaiswal R, McDougall GJ, Kuhnert N. Profiling and quantification of regioisomeric caffeoyl glucoses in berry fruits. J Agric Food Chem. 2018;66: 1096–1104. doi:10.1021/acs.jafc.7b02446
51.	Iswaldi I, Gómez-Caravaca AM, Arráez-Román D, Uberos J, Lardón M, Segura-Carretero A, et al. Characterization by high-performance liquid chromatography with diode-array detection coupled to time-of-flight mass spectrometry of the phenolic fraction in a cranberry syrup used to prevent urinary tract diseases, together with a study of its antibacterial activity. J Pharm Biomed Anal. 2012;58: 34–41. …
52.	Antunes AC, Acunha TDS, Perin EC, Rombaldi CV, Galli V, Chaves FC. Untargeted metabolomics of strawberry (Fragaria x ananassa ’Camarosa’) fruit from plants grown under osmotic stress conditions. J Sci Food Agric. 2019;99: 6973–6980. doi:10.1002/jsfa.9986
53.	Schwarz B, Hofmann T. Isolation, structure determination, and sensory activity of mouth-drying and astringent nitrogen-containing phytochemicals isolated from red currants (Ribes rubrum). J Agric Food Chem. 2007;55: 1405–1410. doi:10.1021/jf0632076
54.	Blanco‐Portales R, Medina‐Escobar N, López‐Ráez JA, González‐Reyes JA, Villalba JM, Moyano E, et al. Cloning, expression and immunolocalization pattern of a cinnamyl alcohol dehydrogenase gene from strawberry (Fragaria × ananassa cv. Chandler). J Exp Bot. 2002;53: 1723–1734. doi:10.1093/jxb/erf029
55.	Song C, Ring L, Hoffmann T, Huang F-C, Slovin J, Schwab W. Acylphloroglucinol biosynthesis in strawberry fruit. Plant Physiol. 2015;169: 1656–1670. doi:10.1104/pp.15.00794
56.	Wen Y-Q, He F, Zhu B-Q, Lan Y-B, Pan Q-H, Li C-Y, et al. Free and glycosidically bound aroma compounds in cherry (Prunus avium L.). Food Chem. 2014;152: 29–36. doi:10.1016/j.foodchem.2013.11.092
57.	Bastos C, Barros L, Dueñas M, Calhelha RC, Queiroz MJRP, Santos-Buelga C, et al. Chemical characterisation and bioactive properties of Prunus avium L.: The widely studied fruits and the unexplored stems. Food Chem. 2015;173: 1045–1053. doi:10.1016/j.foodchem.2014.10.145
58.	Kafkas E, Koşar M, Paydaş S, Kafkas S, Başer KHC. Quality characteristics of strawberry genotypes at different maturation stages. Food Chem. 2007;100: 1229–1236. doi:10.1016/j.foodchem.2005.12.005
59.	Khomych G, Matsuk Y, Nakonechnaya J, Oliynyk N, Medved L. Study of the сhemical composition of cranberry and the use of berries in food technology. East-Eur J Enterp Technol. 2017;6: 59–65. doi:10.15587/1729-4061.2017.117315
60.	Sturm K, Koron D, Stampar F. The composition of fruit of different strawberry varieties depending on maturity stage. Food Chem. 2003;83: 417–422. doi:10.1016/S0308-8146(03)00124-9
61.	Pérez AG, Olías R, Espada J, Olías JM, Sanz C. Rapid determination of sugars, nonvolatile acids, and ascorbic acid in strawberry and other fruits. J Agric Food Chem. 1997;45: 3545–3549. doi:10.1021/jf9701704
62.	Bodel PT, Cotran R, Kass EH. Cranberry juice and the antibacterial action of hippuric acid. J Lab Clin Med. 1959;54: 881–888.
63.	Wang Y, Johnson-Cicalese J, Singh AP, Vorsa N. Characterization and quantification of flavonoids and organic acids over fruit development in American cranberry (Vaccinium macrocarpon) cultivars using HPLC and APCI-MS/MS. Plant Sci. 2017;262: 91–102. doi:10.1016/j.plantsci.2017.06.004
64.	Varming C, Andersen ML, Poll L. Volatile monoterpenes in black currant (Ribes nigrum L.) juice: Effects of heating and enzymatic treatment by β-glucosidase. J Agric Food Chem. 2006;54: 2298–2302. doi:10.1021/jf051938k
65.	Aharoni A, Giri AP, Verstappen FW, Bertea CM, Sevenier R, Sun Z, Jongsma MA, Schwab W, Bouwmeester HJ. Gain and loss of fruit flavor compounds produced by wild and cultivated strawberry species. Plant Cell. 2004 Nov;16(11):3110-31. doi: 10.1105/tpc.104.023895
66.	Dragar C. New diterpenes from blackcurrant buds (Ribes nigrum L.) . Actes de Symposium des Substances Naturelles d'intérêt biologique de la region Pacifique-Asie, ed. Debitus C, Amade P, Laurent D, Cosson J P, 1991
67.	Senica, M., Stampar, F., Veberic, R. & Mikulic-Petkovsek, M. Transition of phenolics and cyanogenic glycosides from apricot and cherry fruit kernels into liqueur. Food Chem. 2016;203: 483–490. doi:10.1016/j.foodchem.2016.02.110

## Sheet: Metadata
Variable	Value
name	name of the identified compound
family	abbreviated name of the chemical family of the compound (AA, amino-acid; AN, anthocyanin; F, flavonoid; CAD, cinnamic acid derivated; BAD, benzoic acid derivated; OA, organic acid; PC, procyanidin; S, sugar; T, terpenoids; M, other metabolite)
formula	chemical formula of the compound
RT	retention time (in min)
[M+H]+ or [M-H]- ion mass (u)	[M+H]+ or [M-H]- ion mass (u) of the compound
Ionisation mode	ionisation mode (pos = positive; neg = negative)
standard validation	validation with commercial standard
MS2	MS2 fragments and corresponding formulas (in u)
validation online database	online database used for validation of identification
Identification confidence level	Identification confidence level as infered using Schymanski E, Jeon J, Gulde R, Fenner K, Ruff M, Singer H P, Hollender J Environ. Sci. Technol. 2014, 48, 4, 2097–2098 ; https://doi.org/10.1021/es5002105
flies	diet-specific fly metabolites present on the ‘compact’ list of fly ions (see Material & Methods section)
fruits	presence in the list of top 50 ions (in term of quantity) of the respective fruits
blackcurrant	references citing presence of the compound in blackcurrant fruit composition
cherry	references citing presence of the compound in cherry fruit composition
cranberry	references citing presence of the compound in cranberry fruit composition
strawberry	references citing presence of the compound in strawberry fruit composition
